# Supplementary figures and images for: Development of an optimized tetracycline-inducible expression system to increase the accumulation of interleukin-10 in tobacco BY-2 suspension cells
Source: Springer Nature journal article supplement (doi:10.1186/1472-6750-12-40), 2012-07-11

1 2 3 5 6 7 8 9 10 11

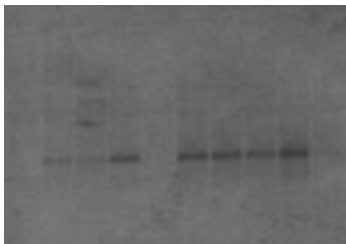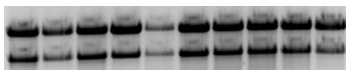

12 13 16 18 25 26 27 29 30 wt

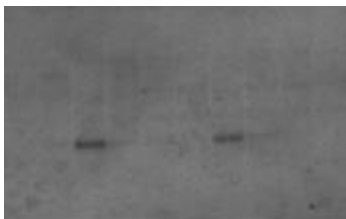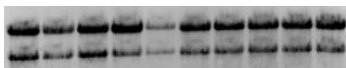

Supplement: 12896_2012_710_MOESM4_ESM.pdf [file 12896_2012_710_MOESM4_ESM.pdf]

$\mu\text{g vIL-10/g FLW}$

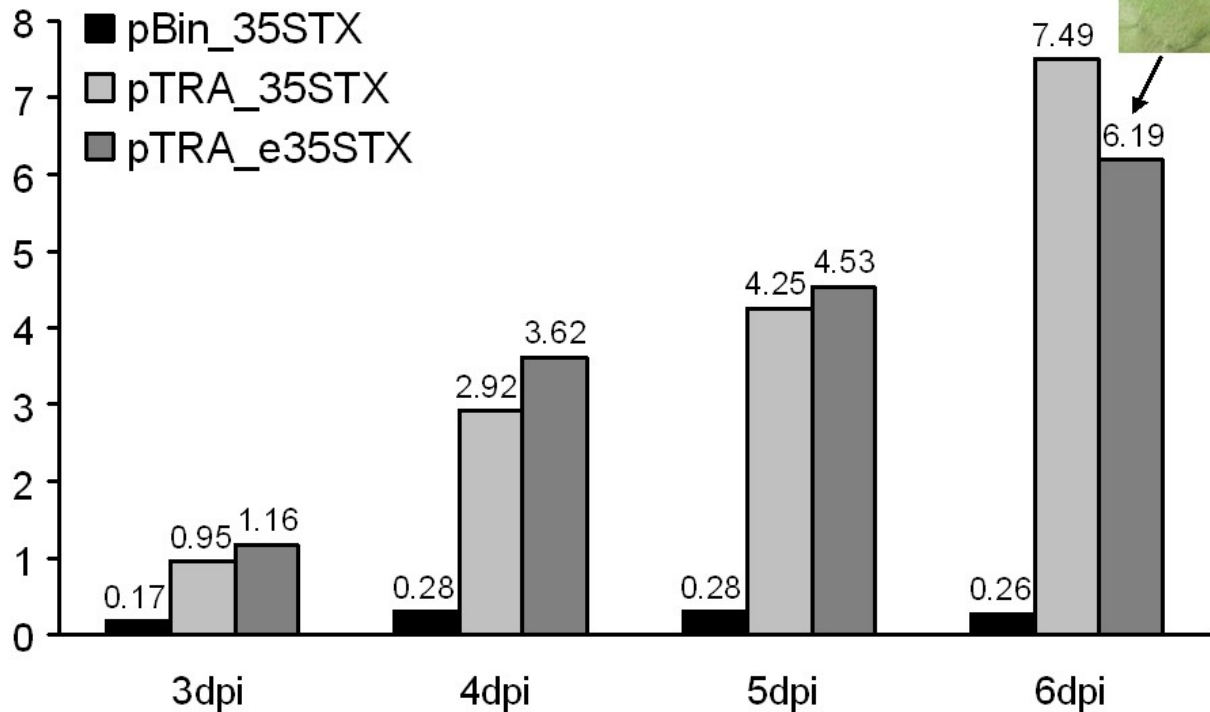

Supplement: 12896_2012_710_MOESM6_ESM.pdf [file 12896_2012_710_MOESM6_ESM.pdf]
